# Supplementary material
Source: PubMed Central journal article supplement (PMC5832841)
Supplement: rspa20170777supp1.pdf [file rspa20170777supp1.pdf]

**“How the formation of amyloid plaques and neurofibrillary tangles may be related – A mathematical modeling study”**

**Proceedings of the Royal Society A**

I. A. Kuznetsov<sup>(a), (b)</sup> and A. V. Kuznetsov<sup>(c)</sup>

<sup>(a)</sup>Perelman School of Medicine, University of Pennsylvania, Philadelphia, PA 19104, USA

<sup>(b)</sup>Department of Bioengineering, University of Pennsylvania, Philadelphia, PA 19104, USA

<sup>(c)</sup>Dept. of Mechanical and Aerospace Engineering, North Carolina State University,

Raleigh, NC 27695-7910, USA; e-mail: [avkuznet@ncsu.edu](mailto:avkuznet@ncsu.edu)

**Supplementary material**

Table S1. Dependent variables in the model of tau transport.

| Symbol       | Definition                                                                                                                 | Units              |
|--------------|----------------------------------------------------------------------------------------------------------------------------|--------------------|
| $n_a^*$      | Concentration of on-track tau moving along MTs anterogradely, propelled by molecular motors                                | $\mu\text{m}^{-1}$ |
| $n_r^*$      | Concentration of on-track tau moving along MTs retrogradely, propelled by molecular motors                                 | $\mu\text{m}^{-1}$ |
| $n_{a0}^*$   | Concentration of pausing on-track tau that is still associated with molecular motors and can resume its anterograde motion | $\mu\text{m}^{-1}$ |
| $n_{r0}^*$   | Concentration of pausing on-track tau that is still associated with molecular motors and can resume its retrograde motion  | $\mu\text{m}^{-1}$ |
| $n_{free}^*$ | Concentration of free (off-track) tau in the cytosol                                                                       | $\mu\text{m}^{-1}$ |
| $n_{st}^*$   | Concentration of stationary tau bound to MTs, no association with motors                                                   | $\mu\text{m}^{-1}$ |
| $n_{dif}^*$  | Concentration of tau diffusing along MTs, no association with motors                                                       | $\mu\text{m}^{-1}$ |
| $n_{mis}^*$  | Concentration of misfolded tau, no mobility                                                                                | $\mu\text{m}^{-1}$ |

Table S2. Independent variables in the models of tau and APP transport.

| Symbol | Definition                          | Units         |
|--------|-------------------------------------|---------------|
| $x^*$  | Cartesian coordinate along the axon | $\mu\text{m}$ |
| $t^*$  | Time                                | s             |

Table S3. Parameters characterizing transport of tau protein and their estimated values. Utilizing Least Squares Regression (LSR), in ref. [30] we determined values of 18 of these parameters that give best-fit with published experimental data.

| Symbol                           | Definition                                                                                                                                               | Units                    | Estimated value        | Reference or estimation method          |
|----------------------------------|----------------------------------------------------------------------------------------------------------------------------------------------------------|--------------------------|------------------------|-----------------------------------------|
| $A$                              | Coefficient in Eq. (2.15)                                                                                                                                |                          | $5.079 \times 10^{-2}$ | LSR                                     |
| $D_{free}^*$                     | Diffusivity of tau protein in the cytosolic state                                                                                                        | $\mu\text{m}^2/\text{s}$ | 3                      | [25]                                    |
| $D_{mt}^*$                       | Diffusivity of tau protein along MTs                                                                                                                     | $\mu\text{m}^2/\text{s}$ | 0.153                  | [28]                                    |
| $j_{tot,tau,x=0}^*$ <sup>a</sup> | Dimensionless total flux of tau into the axon                                                                                                            |                          | $3.753 \times 10^{-3}$ | LSR                                     |
| $k_1^*$                          | Rate constant for the first pseudoelementary step of F-W model (nucleation) describing $n_{free}^* \rightarrow n_{mis}^*$ transition                     | $\text{s}^{-1}$          | $3.011 \times 10^{-8}$ | See the discussion leading to Eq. (3.5) |
| $k_2^* n_{tot,x=0}^*$            | Rescaled rate constant for the second pseudoelementary step of F-W model (autocatalytic growth) describing $n_{free}^* \rightarrow n_{mis}^*$ transition | $\text{s}^{-1}$          | $2.727 \times 10^{-8}$ | See the discussion leading to Eq. (3.5) |
| $L^*$                            | Length of the axon                                                                                                                                       | $\mu\text{m}$            | 600                    | [31]                                    |
| $n_{free,x=0}^*$ <sup>b</sup>    | Dimensionless concentration of free (cytosolic) tau at the                                                                                               |                          | $1.616 \times 10^{-6}$ | LSR                                     |

|                               |                                                                                                                   |                 |                        |                                 |
|-------------------------------|-------------------------------------------------------------------------------------------------------------------|-----------------|------------------------|---------------------------------|
|                               | axon hillock                                                                                                      |                 |                        |                                 |
| $n_{dif,x=0}^c$               | Dimensionless concentration of MT-bound tau protein capable of diffusing along MTs at the axon hillock            |                 | $7.849 \times 10^{-1}$ | LSR                             |
| $T_{1/2,free}^*$ <sup>d</sup> | Half-life of free monomeric tau protein                                                                           | s               | $2.16 \times 10^5$     | [41]                            |
| $T_{1/2,mis}^*$ <sup>e</sup>  | Half-life of misfolded (aggregated) tau protein                                                                   | s               | $2.16 \times 10^5$     | See footnote “e” after Table S3 |
| $v_a^*, v_r^*$                | Velocities of rapid motions of tau on MTs propelled by kinesin and dynein motors, respectively                    | μm/s            | 0.5, 0.5               | [25]                            |
| $\gamma_{10}^*$               | Kinetic constant describing the rate of transitions $n_a^* \rightarrow n_{a0}^*$ and $n_r^* \rightarrow n_{r0}^*$ | s <sup>-1</sup> | $1.710 \times 10^{-1}$ | LSR                             |
| $\gamma_{01}^*$               | Kinetic constant describing the rate of transitions $n_{a0}^* \rightarrow n_a^*$ and $n_{r0}^* \rightarrow n_r^*$ | s <sup>-1</sup> | $5.403 \times 10^{-3}$ | LSR                             |
| $\gamma_{ar}^*$               | Kinetic constant describing the rate of transition $n_{a0}^* \rightarrow n_{r0}^*$                                | s <sup>-1</sup> | $7.904 \times 10^{-7}$ | LSR                             |
| $\gamma_{ra}^*$               | Kinetic constant describing the rate of transition $n_{r0}^* \rightarrow n_{a0}^*$                                | s <sup>-1</sup> | $5.988 \times 10^{-5}$ | LSR                             |
| $\gamma_{on,a}^*$             | Kinetic constant describing the rate of transition $n_{free}^* \rightarrow n_{a0}^*$                              | s <sup>-1</sup> | $1.072 \times 10^{-2}$ | LSR                             |
| $\gamma_{on,r}^*$             | Kinetic constant describing the rate of transition $n_{free}^* \rightarrow n_{r0}^*$                              | s <sup>-1</sup> | $9.985 \times 10^{-6}$ | LSR                             |
| $\gamma_{off,a}^*$            | Kinetic constant describing the rate of transition $n_{a0}^* \rightarrow n_{free}^*$                              | s <sup>-1</sup> | $7.996 \times 10^{-7}$ | LSR                             |

|                                   |                                                                                       |          |                        |     |
|-----------------------------------|---------------------------------------------------------------------------------------|----------|------------------------|-----|
| $\gamma_{off,r}^*$                | Kinetic constant describing the rate of transition $n_{r0}^* \rightarrow n_{free}^*$  | $s^{-1}$ | $2.833 \times 10^{-9}$ | LSR |
| $\gamma_{free \rightarrow st}^*$  | Kinetic constant describing the rate of transition $n_{free}^* \rightarrow n_{st}^*$  | $s^{-1}$ | $9.978 \times 10^{-6}$ | LSR |
| $\gamma_{st \rightarrow free}^*$  | Kinetic constant describing the rate of transition $n_{st}^* \rightarrow n_{free}^*$  | $s^{-1}$ | $1.651 \times 10^{-5}$ | LSR |
| $\gamma_{free \rightarrow dif}^*$ | Kinetic constant describing the rate of transition $n_{free}^* \rightarrow n_{dif}^*$ | $s^{-1}$ | $4.395 \times 10^{-6}$ | LSR |
| $\gamma_{dif \rightarrow free}^*$ | Kinetic constant describing the rate of transition $n_{dif}^* \rightarrow n_{free}^*$ | $s^{-1}$ | $2.167 \times 10^{-3}$ | LSR |
| $\gamma_{dif \rightarrow st}^*$   | Kinetic constant describing the rate of transition $n_{dif}^* \rightarrow n_{st}^*$   | $s^{-1}$ | $7.924 \times 10^{-7}$ | LSR |
| $\gamma_{st \rightarrow dif}^*$   | Kinetic constant describing the rate of transition $n_{st}^* \rightarrow n_{dif}^*$   | $s^{-1}$ | $8.586 \times 10^{-6}$ | LSR |

a  $j_{tot,tau,x=0} = \frac{j_{tot,tau,x=0}^*}{n_{tot,x=0}^* v_a}.$

b  $n_{free,x=0} = \frac{n_{free,x=0}^*}{n_{tot,x=0}^*}.$

c  $n_{dif,x=0} = \frac{n_{dif,x=0}^*}{n_{tot,x=0}^*}.$

<sup>d</sup> Because proteins transported by slow axonal transport (such as tau) on average move anterogradely, they cannot be returned to the soma for degradation. Their concentration depends on their half-lives, in the axon and in the synapse, which are not necessarily the same [79].

<sup>e</sup> In the F-W model, misfolded tau represents many different fibril sizes, which may have different half-lives. Due to a lack of published experimental data, as a first approximation we assigned  $T_{1/2,mis}^*$  the same value as to the half-life of free monomeric tau. This assumption may

need to be critically reevaluated later, in particular because misfolded tau aggregates may disrupt proteasome function [19] resulting in a longer half-life of tau aggregates.

Table S4. Dependent variables in the model of APP transport.

| Symbol  | Definition                                                            | Units              |
|---------|-----------------------------------------------------------------------|--------------------|
| $c_+^*$ | Concentration of anterogradely transported APP                        | $\mu\text{m}^{-1}$ |
| $c_-^*$ | Concentration of retrogradely transported APP                         | $\mu\text{m}^{-1}$ |
| $c_0^*$ | Concentration of free APP (not actively transported by motors on MTs) | $\mu\text{m}^{-1}$ |

Table S5. Parameters characterizing APP transport and their estimated values.

| Symbol           | Definition                                                                                                         | Units           | Estimated value           | Reference or estimation method         |
|------------------|--------------------------------------------------------------------------------------------------------------------|-----------------|---------------------------|----------------------------------------|
| $c_{-,x=L}^a$    | Ratio of retrogradely running APP at the end of the axon to anterogradely running APP at the beginning of the axon |                 | $0.4 \frac{v_+^*}{v_-^*}$ | See the analysis leading to Eq. (2.28) |
| $v_+^{*b}$       | Anterograde velocity of APP-transporting vesicles propelled by kinesin motors                                      | $\mu\text{m/s}$ | 1.74                      | [60]                                   |
| $v_-^{*b}$       | Retrograde velocity of APP-transporting vesicles propelled by dynein motors                                        | $\mu\text{m/s}$ | 1.51                      | [60]                                   |
| $\alpha_+^{*c}$  | Kinetic constant describing the rate of transition $c_0^* \rightarrow c_+^*$                                       | $\text{s}^{-1}$ | 1                         | [57]                                   |
| $\alpha_-^{*c}$  | Kinetic constant describing the rate of transition $c_0^* \rightarrow c_-^*$                                       | $\text{s}^{-1}$ | 1                         | [57]                                   |
| $\alpha_+'^{*c}$ | Kinetic constant describing the rate of transition $c_+^* \rightarrow c_0^*$                                       | $\text{s}^{-1}$ | 0.4609                    | [57]                                   |

|                              |                                                                                                                  |          |                 |                                                                                                                                                                                                                                                      |
|------------------------------|------------------------------------------------------------------------------------------------------------------|----------|-----------------|------------------------------------------------------------------------------------------------------------------------------------------------------------------------------------------------------------------------------------------------------|
| $\alpha'^*_{-}$ <sup>c</sup> | Kinetic constant describing the rate of transition $c^*_{-} \rightarrow c^*_0$                                   | $s^{-1}$ | 1               | [57]                                                                                                                                                                                                                                                 |
| $\beta$                      | A parameter in Eq. (3.2) that characterizes how quickly $\alpha'^*_{+}$ increases when misfolded tau is produced |          | $8 \times 10^3$ | The value $8 \times 10^3$ was found by performing numerical experiments so that the maximum value that $\alpha'^*_{+}$ takes at steady-state equals twice the value that $\alpha'^*_{+}$ takes at the initial time, when $n_{mis} = 0$ (see Fig. 5b) |

$$^a c_{-,x=L} = \frac{c^*_{-,x=L}}{c^*_{+,x=L}}$$

<sup>b</sup> Although parameters  $v^*_a$  and  $v^*_+$  characterize cargo velocities propelled by kinesin motors, they are not necessarily the same because they describe motion of different cargos;  $v^*_a$  characterizes tau transport and  $v^*_+$  characterizes APP transport. A similar statement applies to  $v^*_r$  and  $v^*_-$ .

<sup>c</sup> Since there is no published data that allow us to estimate values of kinetic constants for APP transport, we relied on [57] and assumed that kinetic constants are of order  $1 \text{ s}^{-1}$ . We used a value of  $1 \text{ s}^{-1}$  for  $\alpha^*_{-}$ ,  $\alpha^*_{+}$ , and  $\alpha'^*_{-}$  and we set  $\alpha'^*_{+} = 0.4 \frac{v^*_+}{v^*_-} = 0.4609 \text{ s}^{-1}$ .

### Measuring the distance between distributions computed with and without tau agglomeration in Figs. 3 and 4

The dimensionless distance between distributions of various observables computed with and without tau agglomeration (Figs. 3a,b and 4a,b) was evaluated by using the  $L^2$  distance [73]. For example, for the total dimensionless tau concentration (Fig. 3a) this distance is defined as:

$$d(n_{tot,no \ aggl}, n_{tot,with \ aggl}) = \frac{1}{L^*} \sqrt{\int_0^{L^*} [n_{tot,no \ aggl}(x^*) - n_{tot,with \ aggl}(x^*)]^2 dx^*} . \quad (S1)$$
